# Supplementary material for: Red Ginseng Attenuates the Hepatic Cellular Senescence in Aged Mice
Source: MDPI journal article supplement (doi:10.3390/biology13010036), 2024-01-08
Supplement: s1 [file s1]

## **Supplementary material**

Figures S1–S4: details of western blot membranes

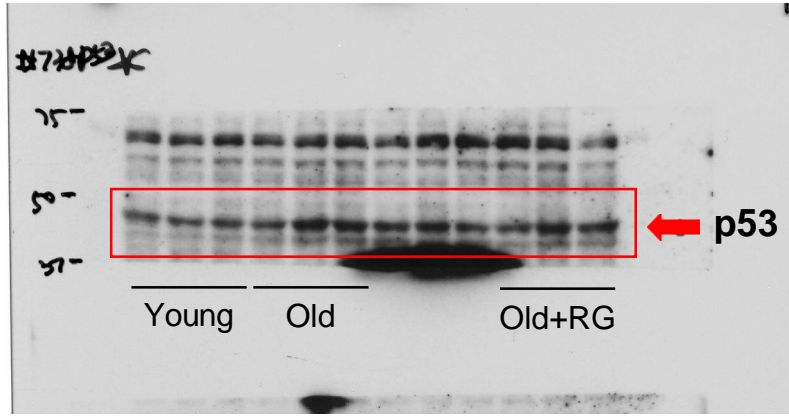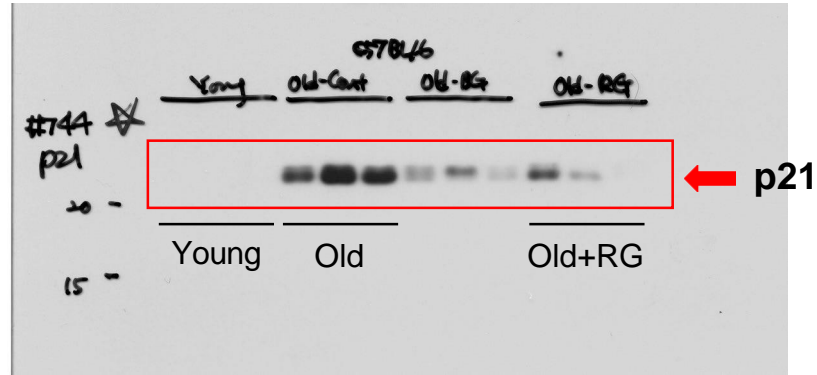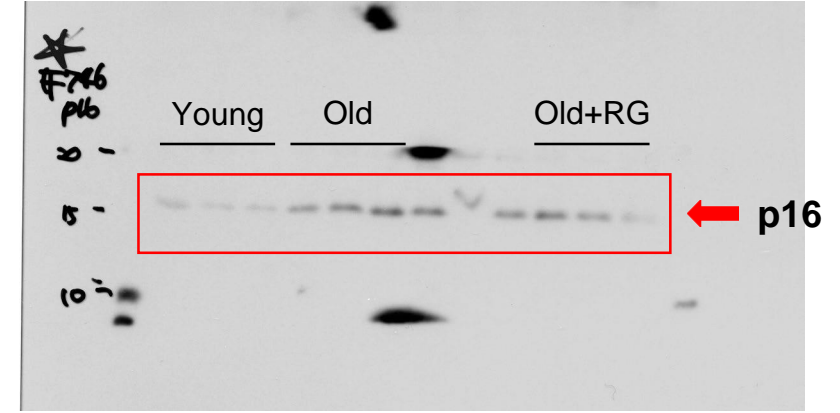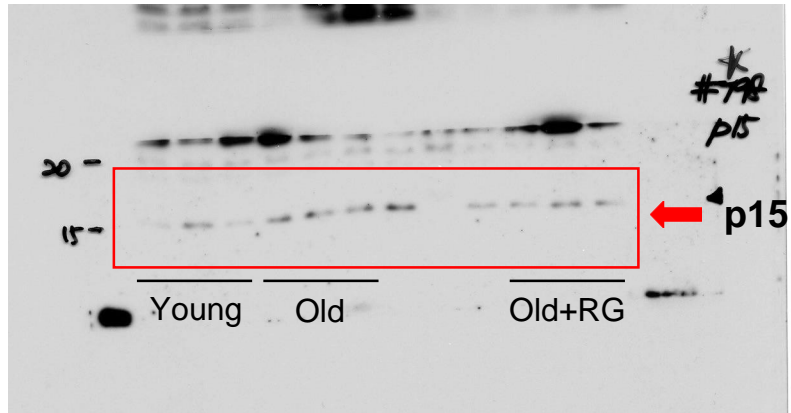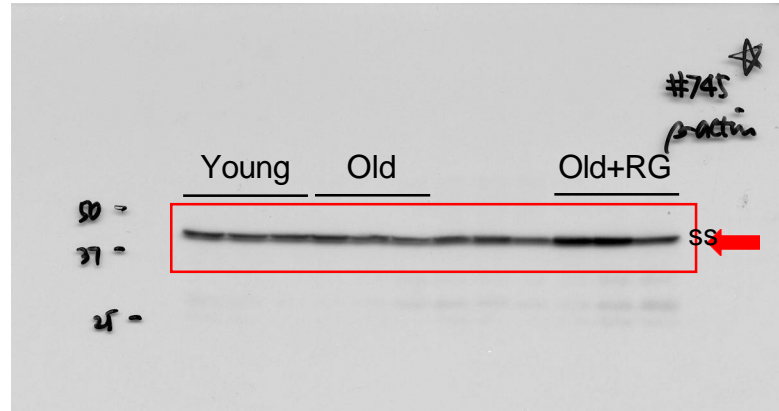

Supplemental Figure S1. Total liver tissue lysates were immunoblotted with cellular senescence-related markers: p53, p21, p16, and p15. (Supports Figure 2A).

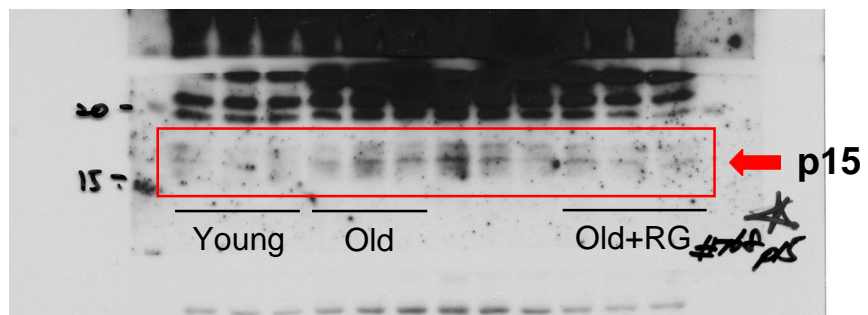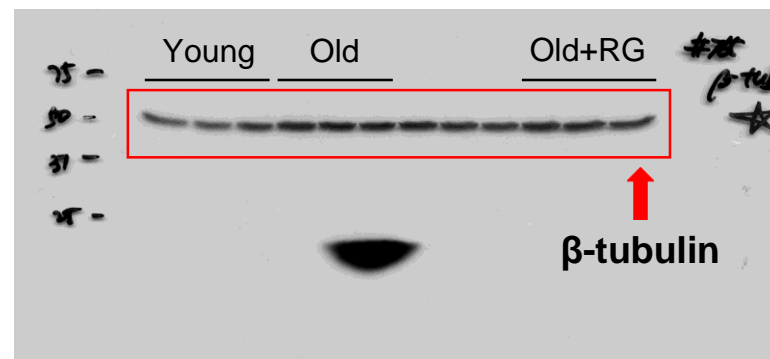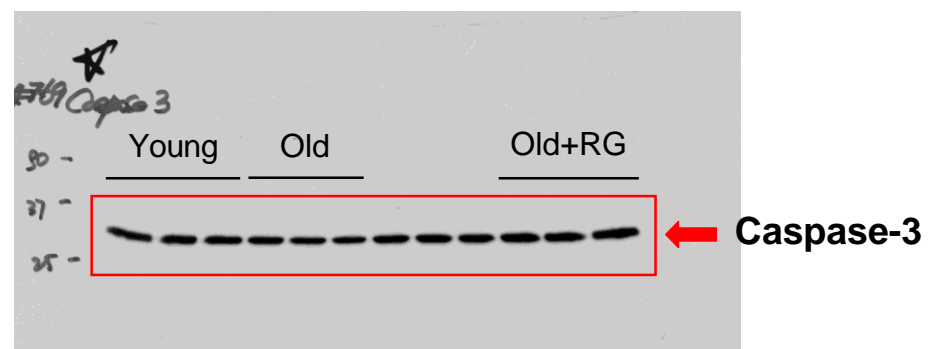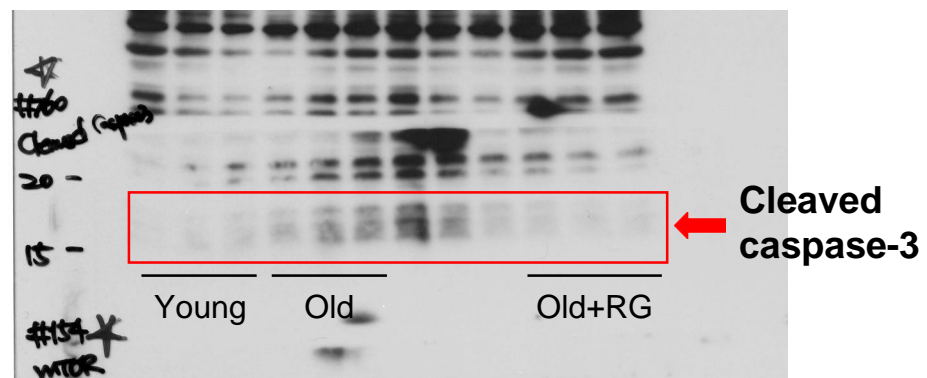

Supplemental Figure S2. Primary hepatocytes were isolated from Young, Old, and Old + RG mice, followed by immunoblotting with p15 and cleaved caspase-3 and caspase-3. (Supports Figure 2B, 2C).

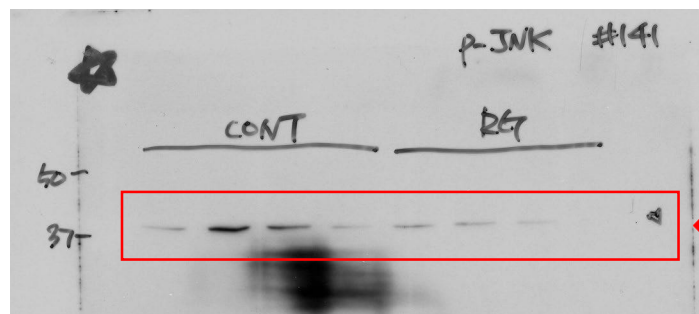

← p-JNK

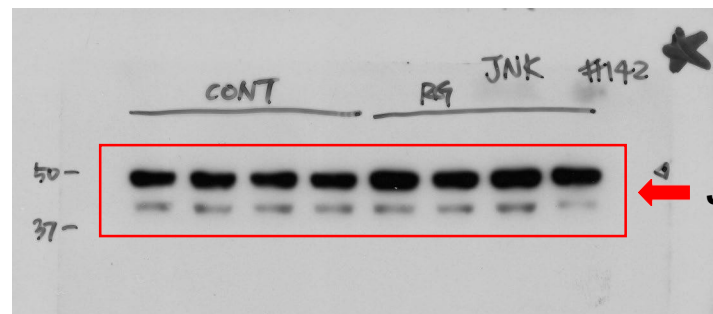

← JNK

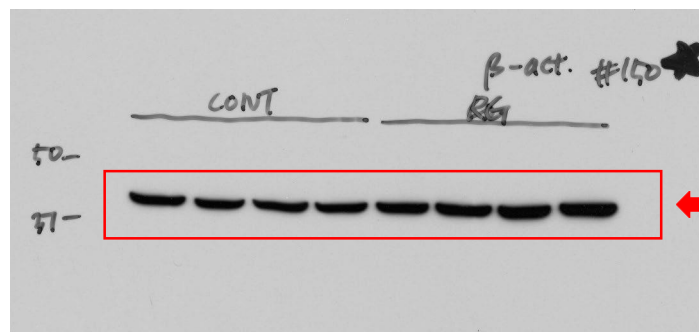

←  $\beta$ -actin

Supplemental Figure S3. The immunoblots were quantified by normalizing p-JNK and JNK to  $\beta$ -actin and p-JNK to total JNK. (Supports Figure 4A).

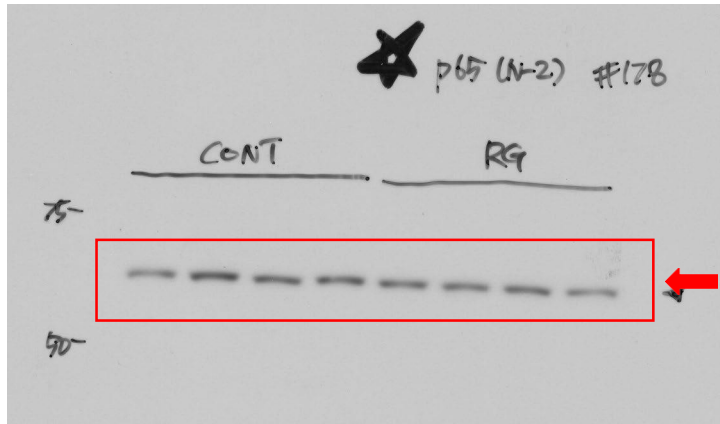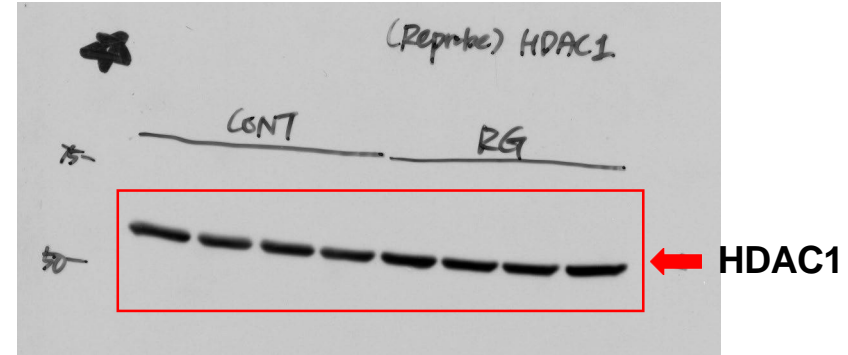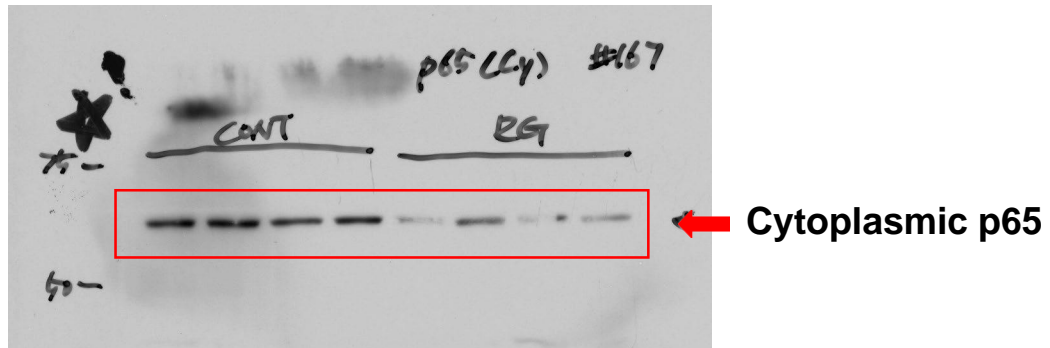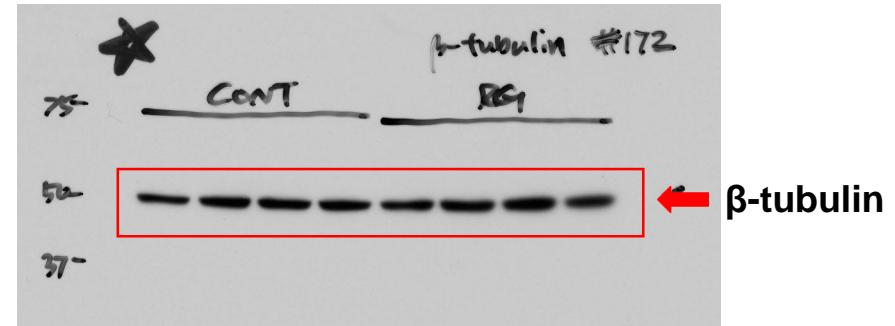

Supplemental Figure S4. The nuclear and cytoplasmic fractions were fractionated from the mouse liver tissues. The quantification of immunoblots was performed by the normalization of nuclear p65 to HDAC1, and cytoplasmic p65 to  $\beta$ -tubulin. (Supports Figure 4B).
